# Supplementary material
Source: HighWire-hosted journal article supplement (https://www.life-science-alliance.org/content/5/12/e202201584/F3)

Fig. 1C

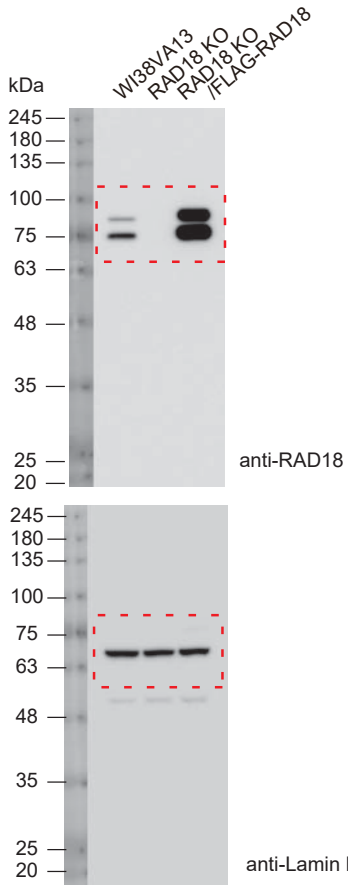

Fig. 1D

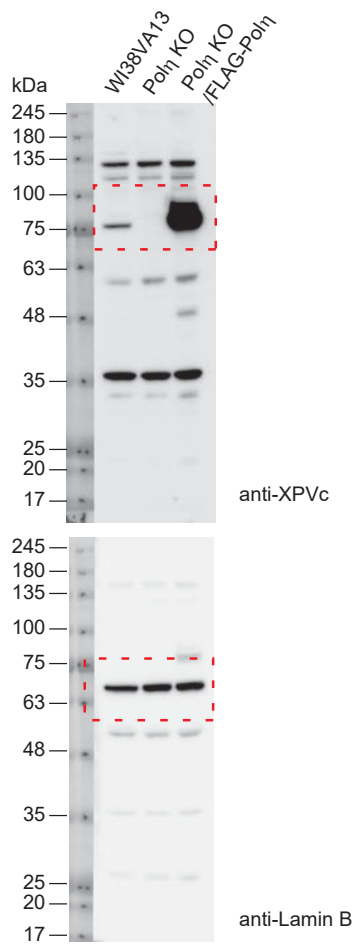

Fig. 1F

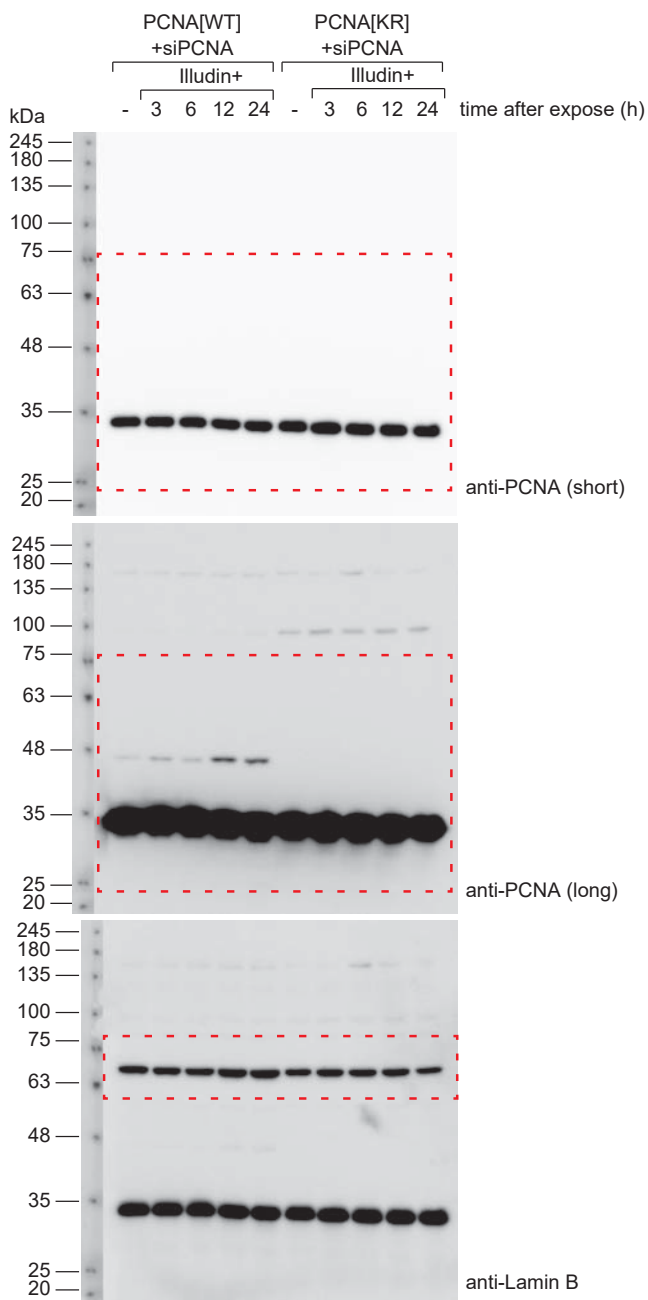

Fig. 1G

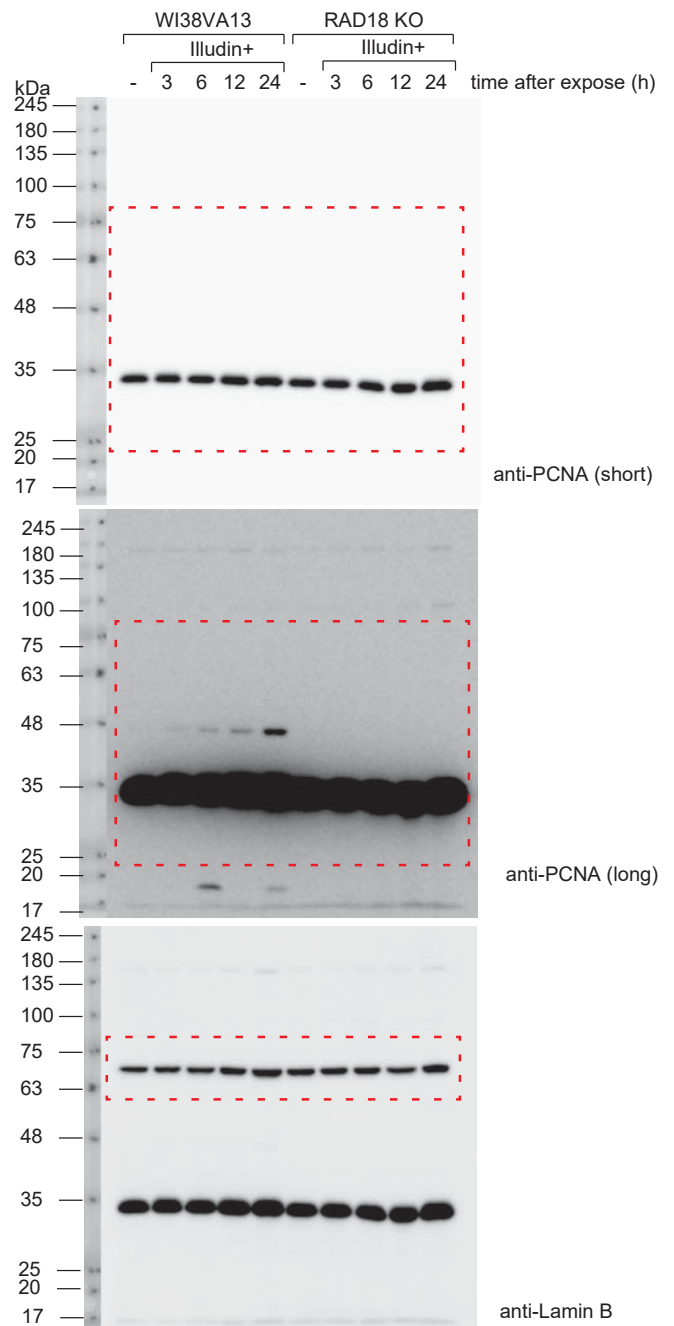

Fig. 21

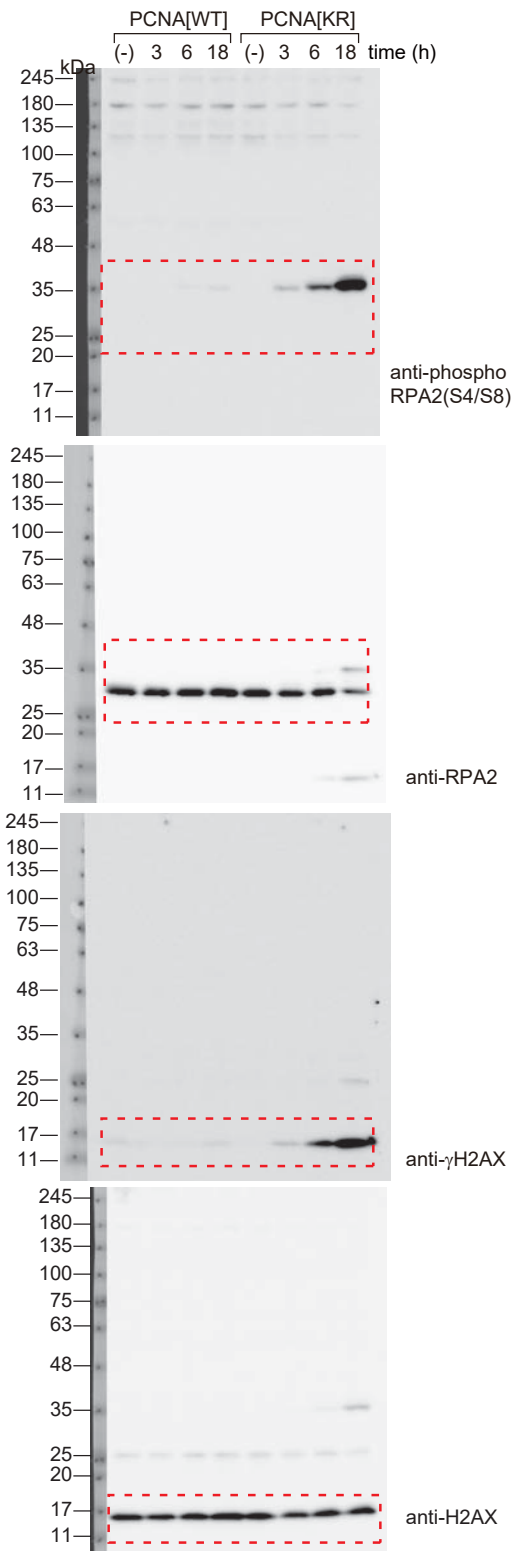

Fig. 3B

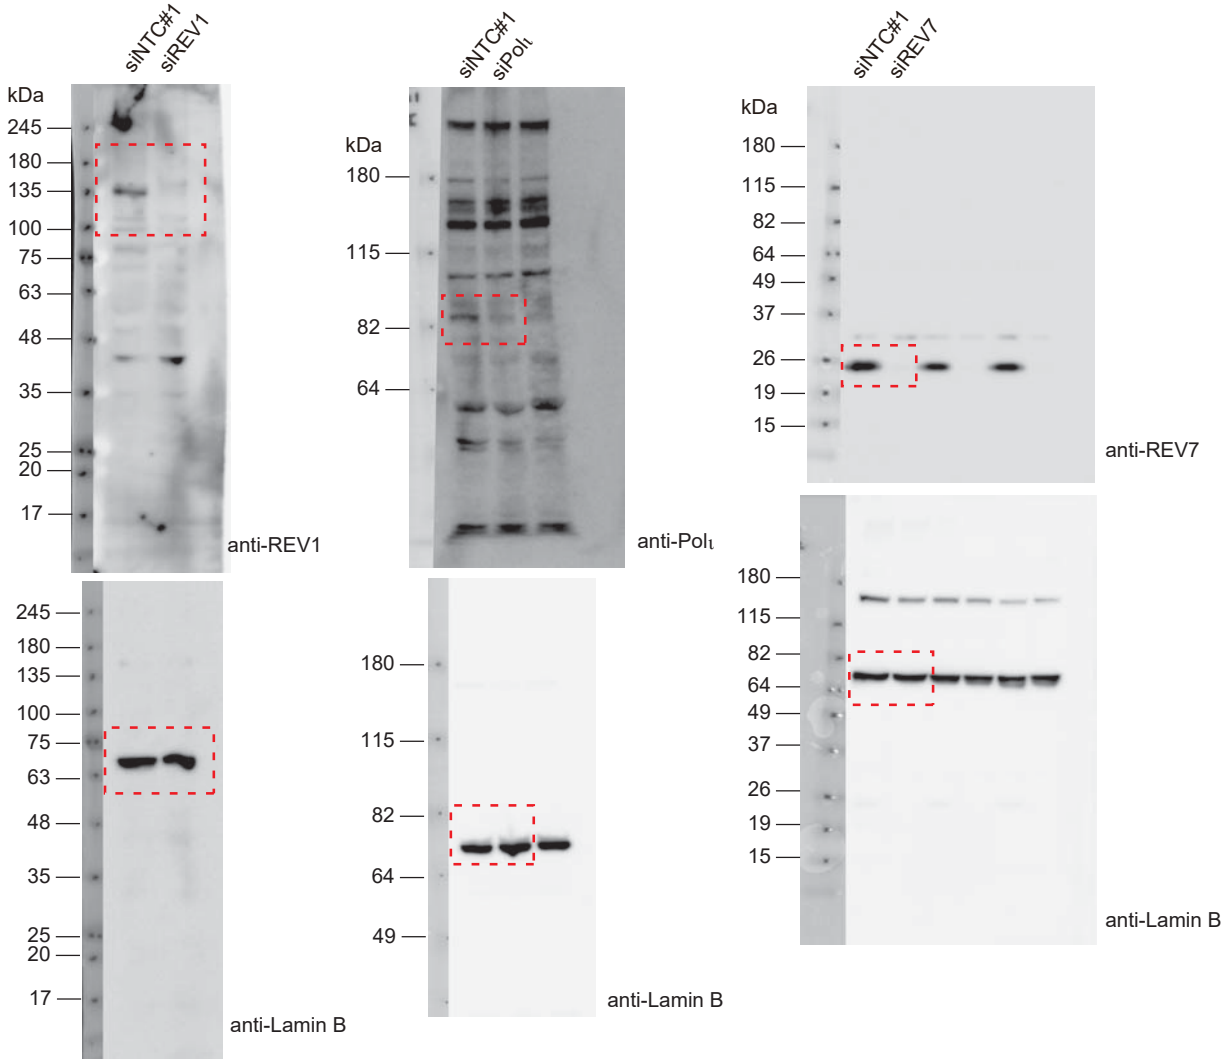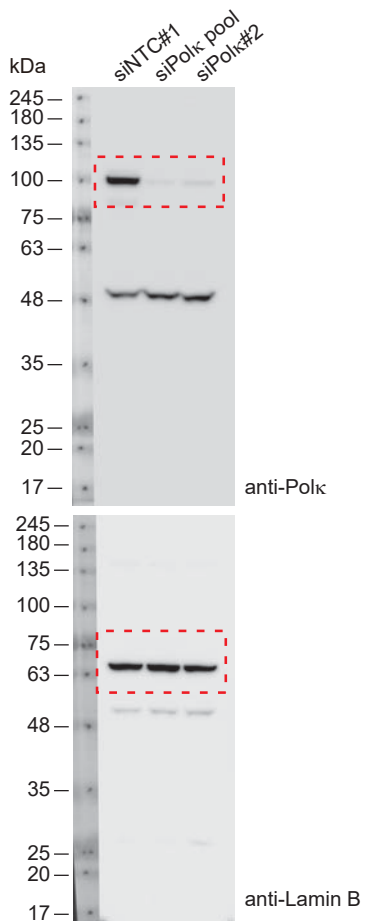

Fig. 3D

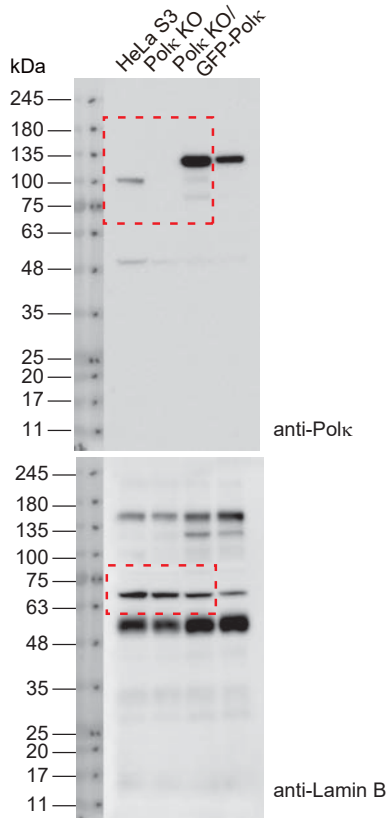

Fig. 3O

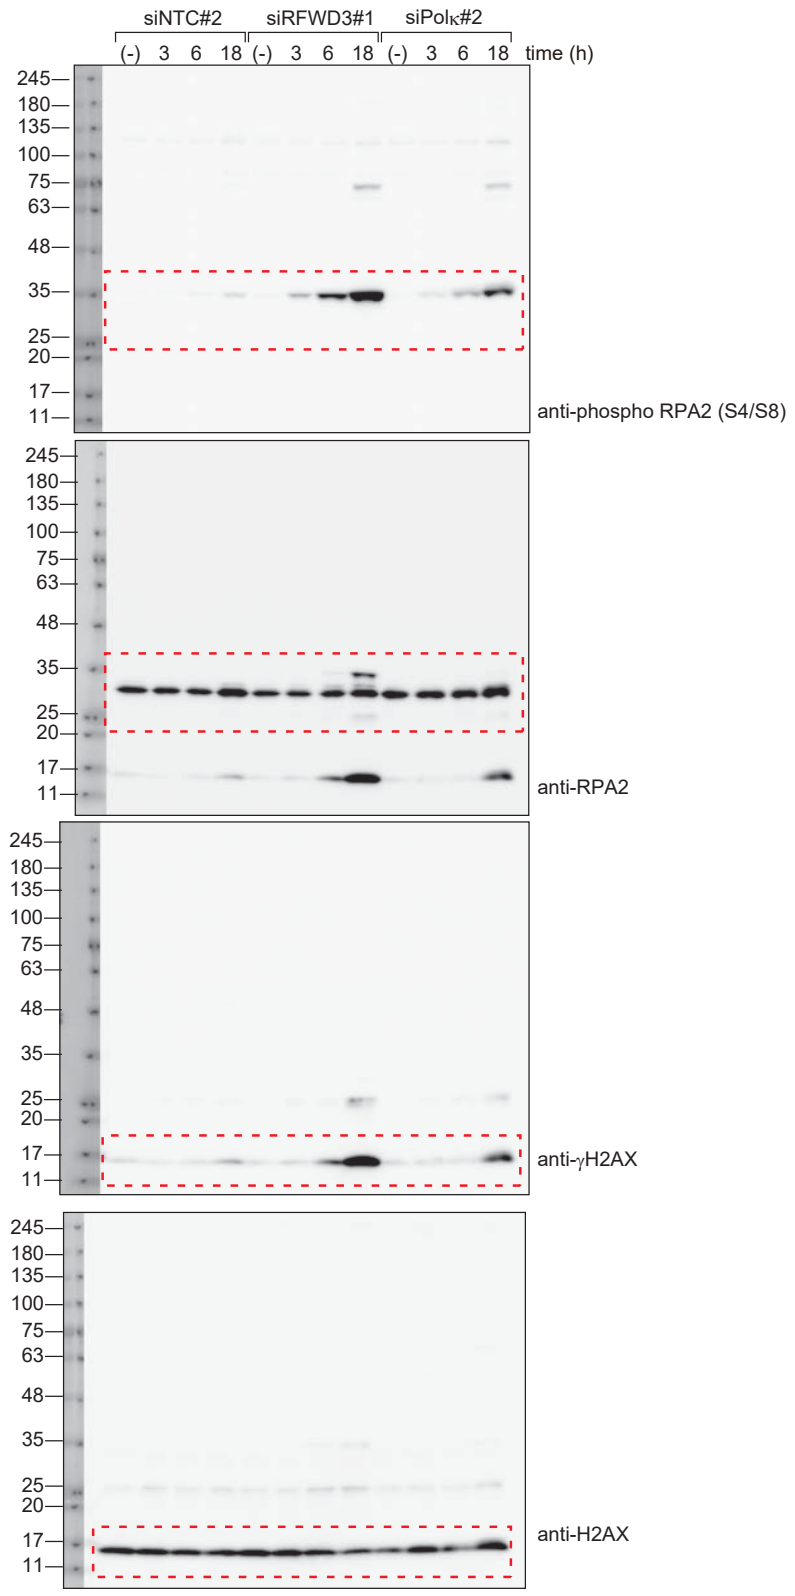

Fig. 3F

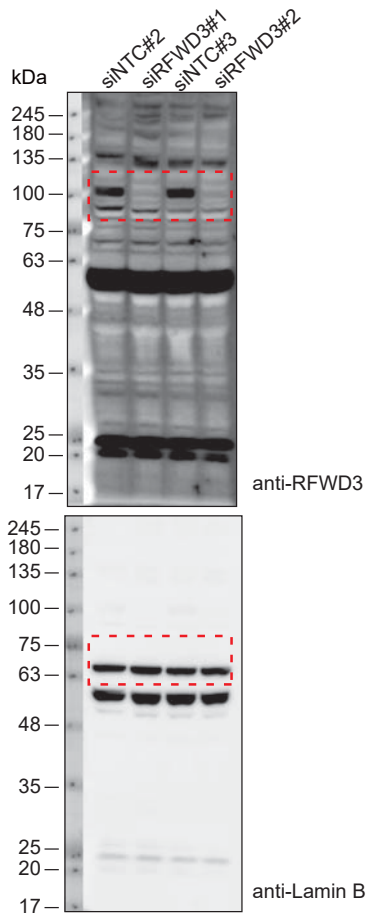

Fig. 4B

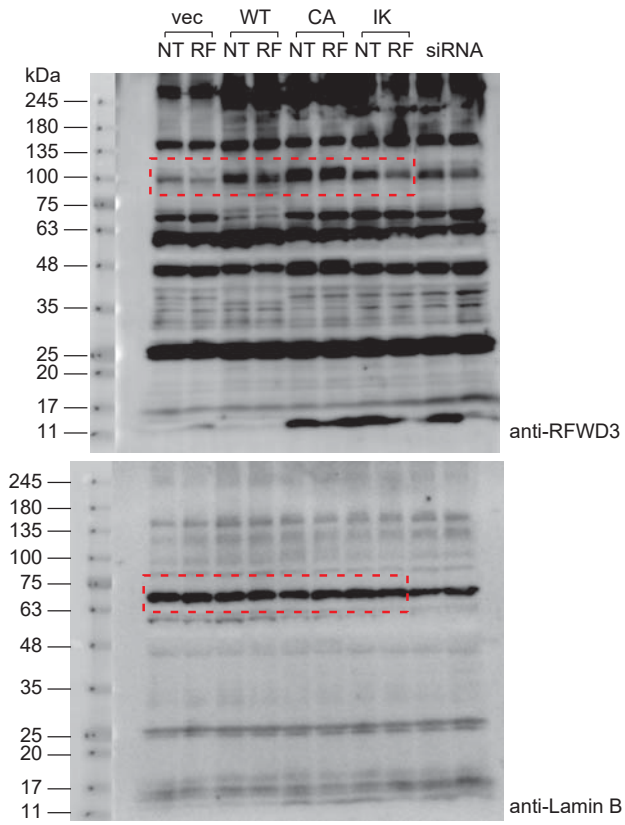

Fig. 4D

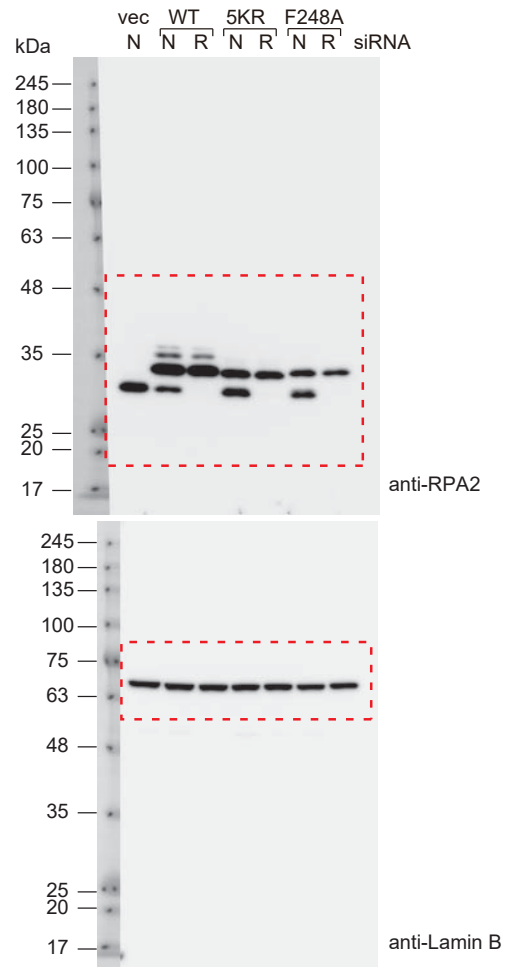

Fig. 5B

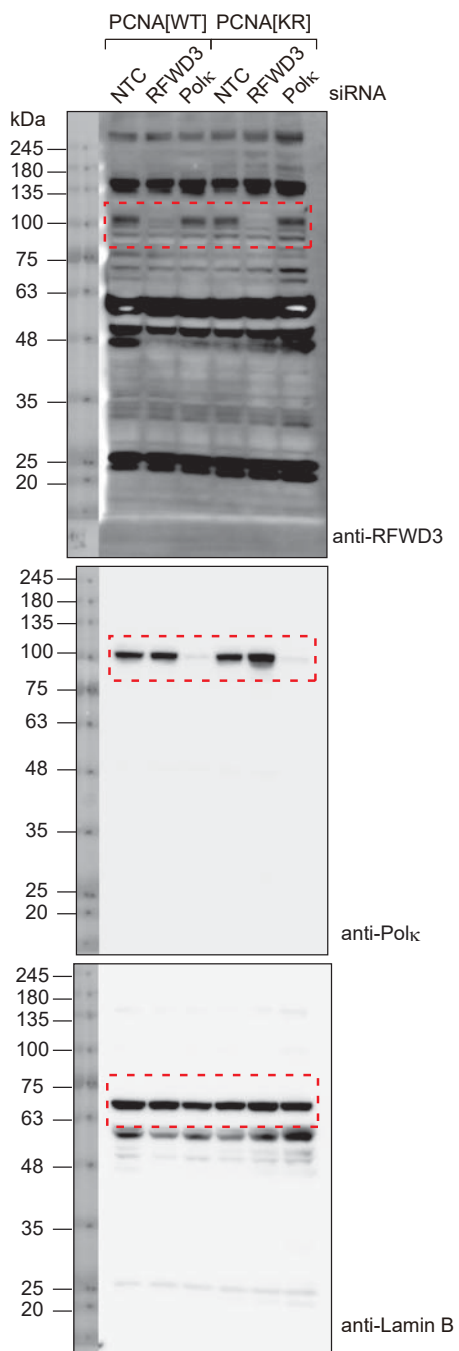

Supplement: inline-supplementary-material-3 [file inline-supplementary-material-3.pdf]
